# Supplementary material for: ATNT: an enhanced system for expression of polycistronic secondary metabolite gene clusters in Aspergillus niger
Source: PubMed Central journal article supplement (PMC5735947; doi:10.1186/s40694-017-0042-1), 2017-12-19
Supplement: 40694_2017_42_MOESM2_ESM.pdf [file 40694_2017_42_MOESM2_ESM.pdf]

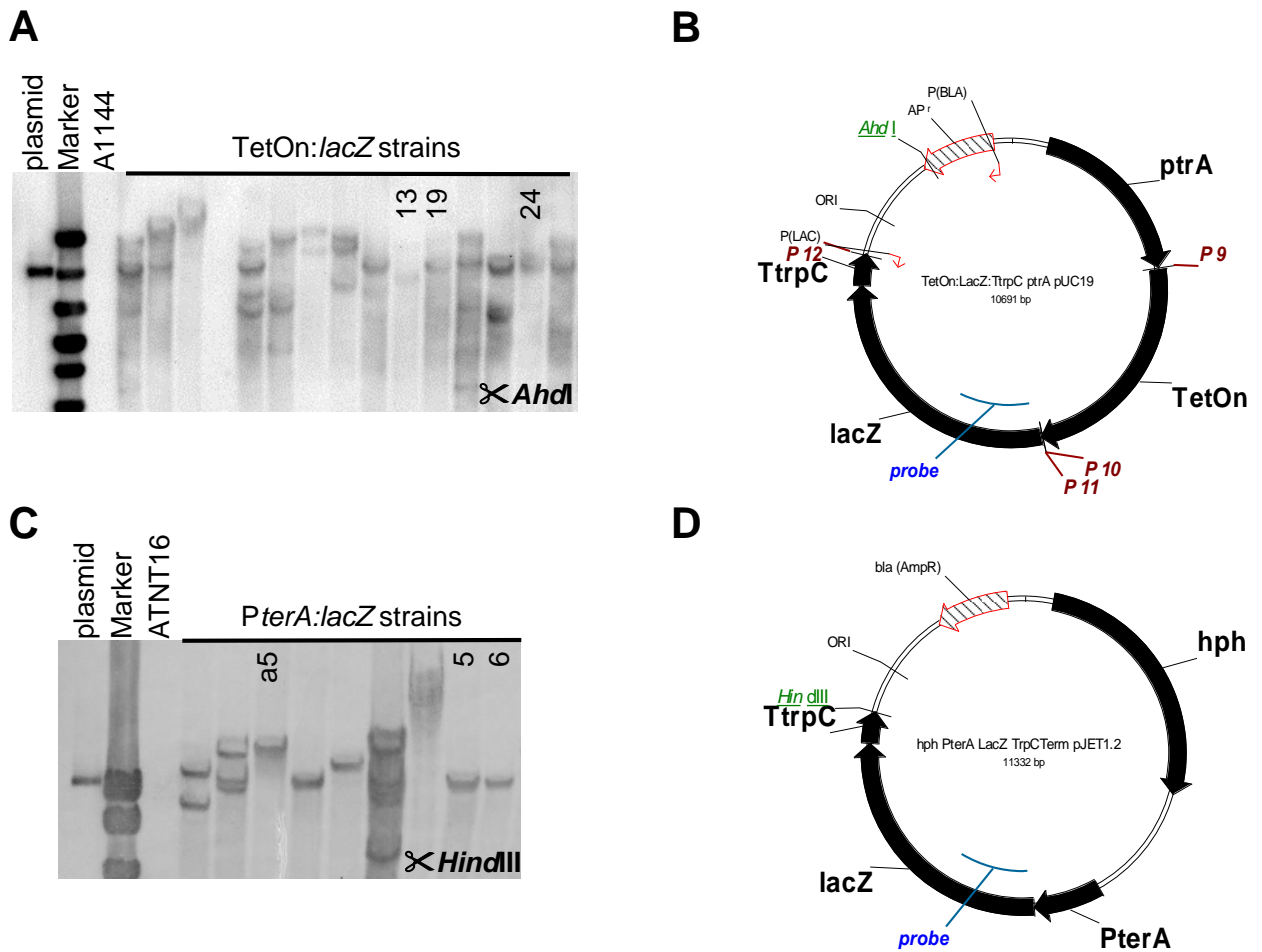

**Additional file 2: Southern blot analyses and plasmid maps of constructs used for generation of *lacZ* reporter strains.** (A, C) Southern blot for identification of single copy integration strains. Digoxigenin labelled probes were used for hybridisation. Transformants used in subsequent analyses are numbered. (A) A1144 strains with integration of the *tet-on:lacZ* construct. Plasmid control and genomic DNA of parental strains and transformants were restricted with *AhdI*, which cuts once in the respective plasmid. (C) ATNT16 strain transformed with the *PterA:lacZ* construct. Plasmid control and genomic DNA of parental strains and transformants were restricted with *HindIII*, which cuts once in the respective plasmid. (B, D) Plasmid maps of the transformation constructs. Position of oligonucleotides used in this study (P + number) as well as the position of the probe generated for Southern blot analyses and position of the restriction enzyme are shown. ptrA = pyrithiamine resistance cassette. hph = hygromycin resistance cassette. PterA = *terA* promoter from *Aspergillus terreus*. lacZ =  $\beta$ -galactosidase gene from *Escherichia coli*. TtrpC = *trpC* terminator sequence from *Aspergillus terreus*.
