# Supplementary material for: ATNT: an enhanced system for expression of polycistronic secondary metabolite gene clusters in Aspergillus niger
Source: PubMed Central journal article supplement (PMC5735947; doi:10.1186/s40694-017-0042-1), 2017-12-19
Supplement: 40694_2017_42_MOESM3_ESM.pdf [file 40694_2017_42_MOESM3_ESM.pdf]

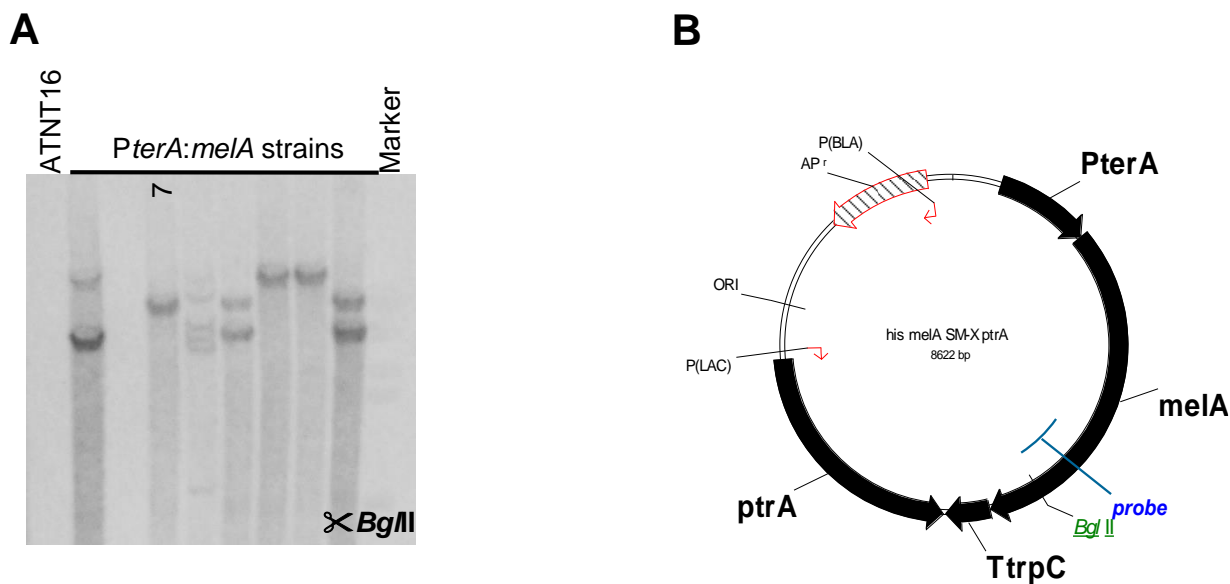

**Additional file 3: Southern blot analysis and plasmid map of construct used for generation of ATNT *melA* strains.** (A) Southern blot for identification of single copy integration strains. A digoxigenin labelled probe was used for hybridisation. Plasmid control and genomic DNA of parental strains and transformants were restricted with *BglII*, which cuts once in the respective plasmid. The transformant used in subsequent analyses is numbered. (B) Plasmid map of the transformation construct. Position of oligonucleotides used in this study (P + number) as well as the position of the probe generated for Southern blot analysis and position of the restriction enzyme are shown. ptrA = pyrithiamine resistance cassette. PterA = *terA* promoter from *Aspergillus terreus*. TtrpC = *trpC* terminator sequence from *Aspergillus terreus*. melA = Aspulvinone E-synthetase gene *melA* from *Aspergillus terreus*.
