# Supplementary material for: ATNT: an enhanced system for expression of polycistronic secondary metabolite gene clusters in Aspergillus niger
Source: PubMed Central journal article supplement (PMC5735947; doi:10.1186/s40694-017-0042-1), 2017-12-19
Supplement: 40694_2017_42_MOESM4_ESM.pdf [file 40694_2017_42_MOESM4_ESM.pdf]

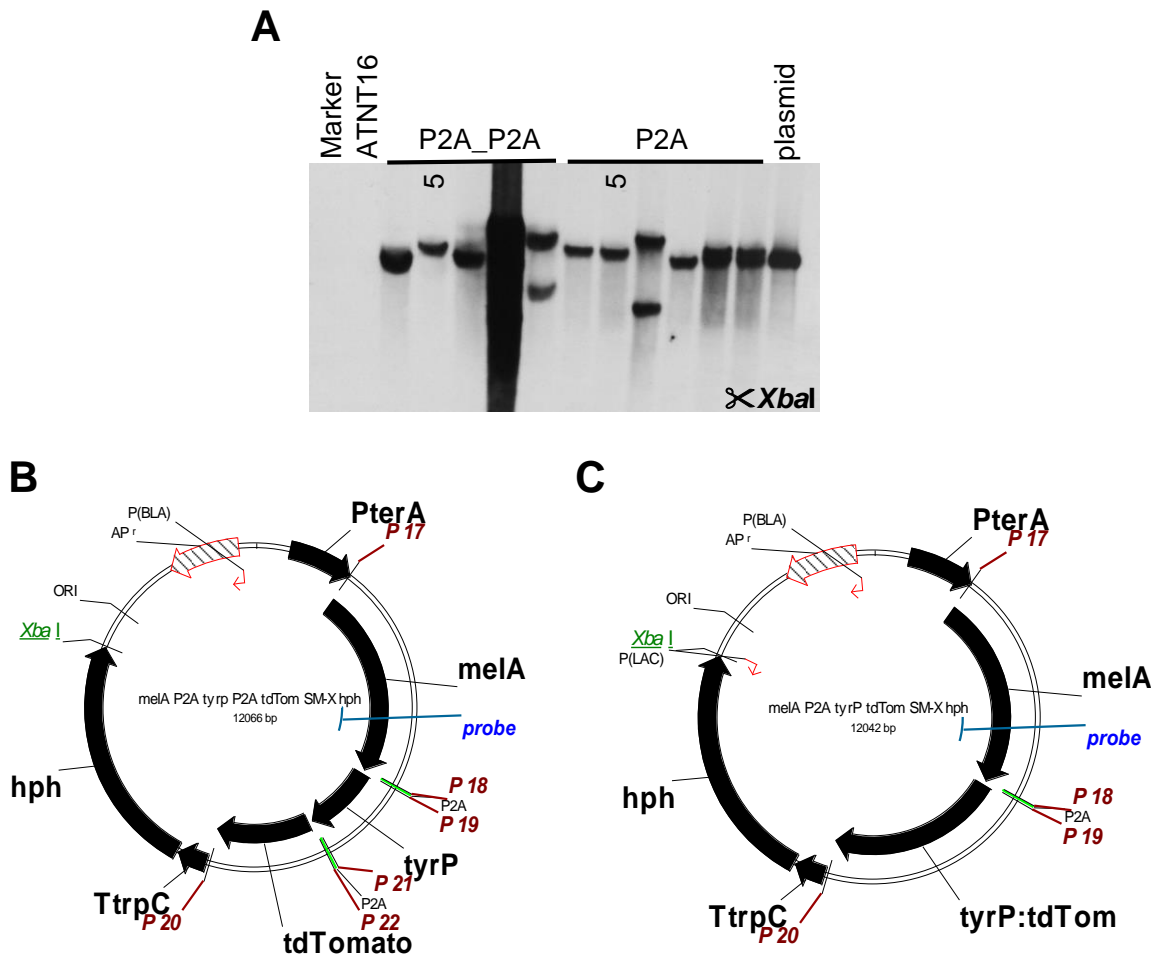

**Additional file 4: Southern blot analyses and plasmid maps of constructs used for generation of ATNT16 P2A\_P2A and P2A strains.** (A) Southern blot for identification of single copy integration strains. A digoxigenin labelled probe was used for hybridisation. Plasmid control and genomic DNA of parental strains and transformants were restricted with *XbaI*, which cuts once in the respective plasmids. Transformants used in subsequent analyses are numbered. (B, C) Plasmid maps of the transformation constructs. Position of oligonucleotides used in this study (P + number) as well as the position of the probe generated for Southern blot analysis and position of the restriction enzyme are shown. *hph* = hygromycin B resistance cassette. *PterA* = *terA* promoter from *Aspergillus terreus*. *TtrpC* = *trpC* terminator sequence from *Aspergillus terreus*. *melA* = Aspulvinone E-synthetase gene *melA* from *Aspergillus terreus*. *tyrP* = tyrosinase gene *tyrP* from *Aspergillus terreus*. *td-Tomato* = codon optimised *td-Tomato* gene. *tyrP:td-Tom* = fusion of *tyrP* and *td-Tomato* genes. *P2A* = sequence coding for the 2A peptide from porcine teschovirus-1.
